# Supplementary material for: Tagitinin C induces ferroptosis through PERK-Nrf2-HO-1 signaling pathway in colorectal cancer cells
Source: PubMed Central journal article supplement (PMC8326123; doi:10.7150/ijbs.59404), 2021-06-26

# Tagitinin C induces ferroptosis through PERK-Nrf2-HO-1 signaling pathway in colorectal cancer cells.

Ruiran Wei <sup>1</sup>, Yueqin Zhao <sup>2</sup>, Juan Wang <sup>2</sup>, Xu Yang <sup>2</sup>, Shunlin Li <sup>2</sup>, Yinyuan Wang <sup>2</sup>, Xingzhi Yang <sup>2</sup>, Jimin Fei <sup>3</sup>, Xiaojiang Hao <sup>2</sup>, Yuhan Zhao <sup>2,\*</sup>, Liming Gui <sup>1,\*</sup> and Xiao Ding <sup>2,\*</sup>

<sup>1</sup> Center for Tissue Engineering and Stem Cell Research, Guizhou Medical University 550004, Guiyang, China;

<sup>2</sup> State Key Laboratory of Phytochemistry and Plant Resource in West China, Kunming Institute of Botany, Chinese Academy of Sciences, 650201, Kunming, China

<sup>3</sup> Yunnan Cancer Hospital & The Third Affiliated Hospital of Kunming Medical University, 650118, Kunming, China

\* Correspondence: zhaoyuhan@mail.kib.ac.cn (Y.Z.); guiliming@gmc.edu.cn(L.G.); dingxiao@mail.kib.ac.cn (X.D.)

## Supplementary Figure S1

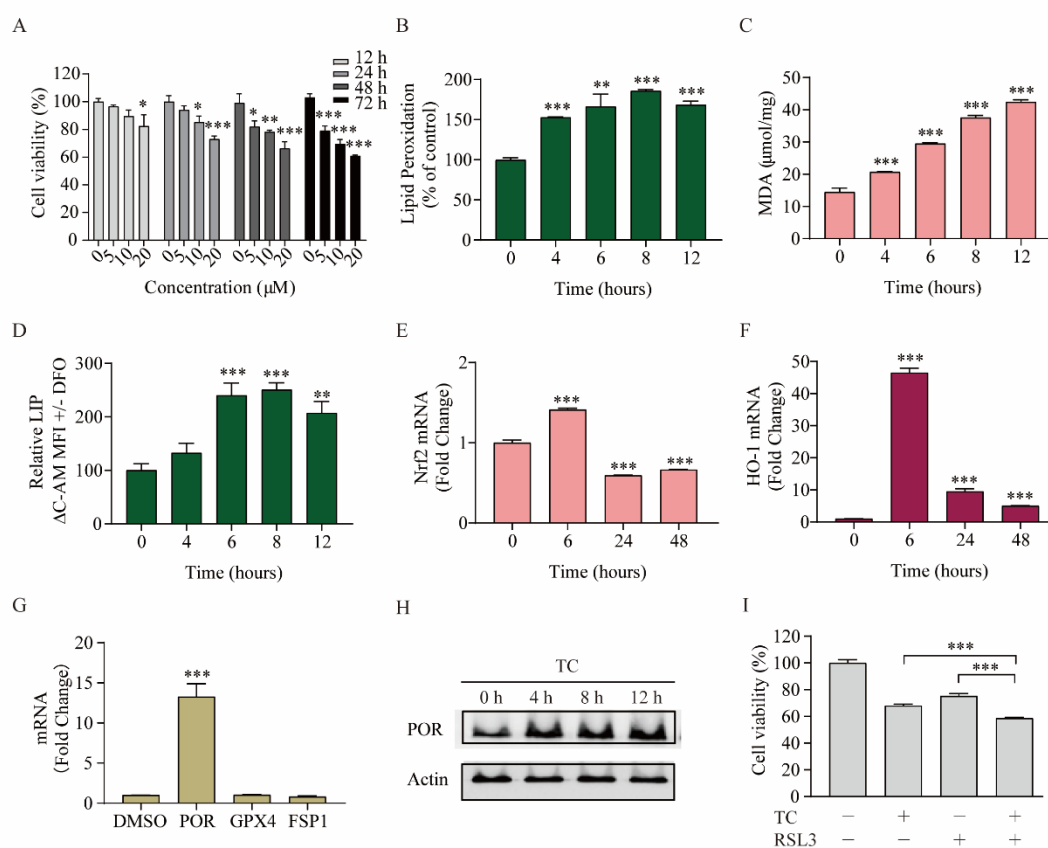

**Figure S1.** (A) Cell viability of HCT116 cells were measured by MTT assay after treatment with indicated concentration of erastin (0, 5, 10, 20  $\mu$ M) at 12, 24, 48 and 72 h. (B-D) The contents of lipid peroxidation (B), MDA (C) and the cellular LIP levels (D) in HCT116 cells at 0, 4, 6, 8 and 12 h under the concentration of 20  $\mu$ M tagitinin C. (E-F) Nrf2 and HO-1 mRNA were measured at 24 and 48 h after treatment of tagitinin C (20  $\mu$ M) in HCT116 cells. (G) POR, FSP1 and GPX4 mRNA were measured at 6 h after treatment of tagitinin C (20  $\mu$ M) in HCT116 cells. (H) The ferroptosis-related

protein POR was determination by Western Blot. **(I)** Cell viability of HCT116 cells were measured by MTT assay after treatment with TC (10  $\mu$ M) and RSL3 (20  $\mu$ M) at 24 h.

### Supplementary Figure S2

Figure 6A

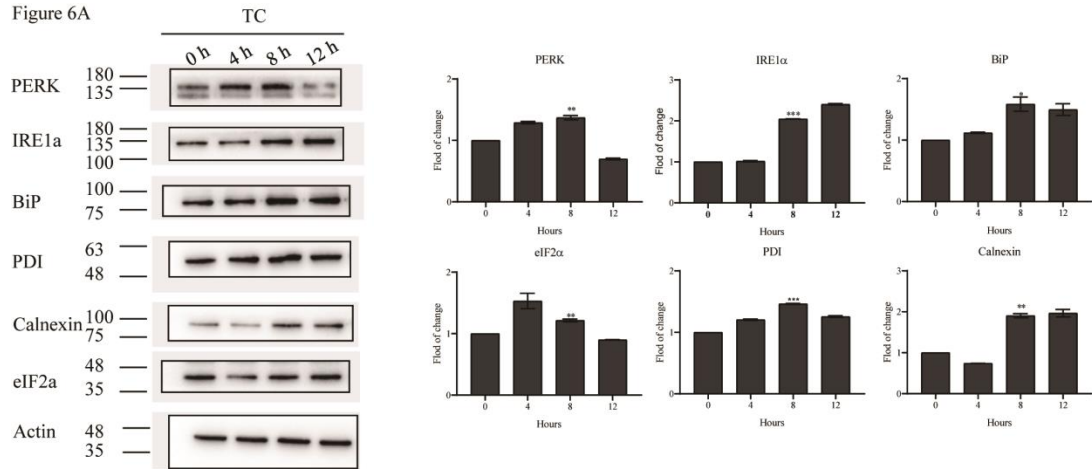

Figure 6D

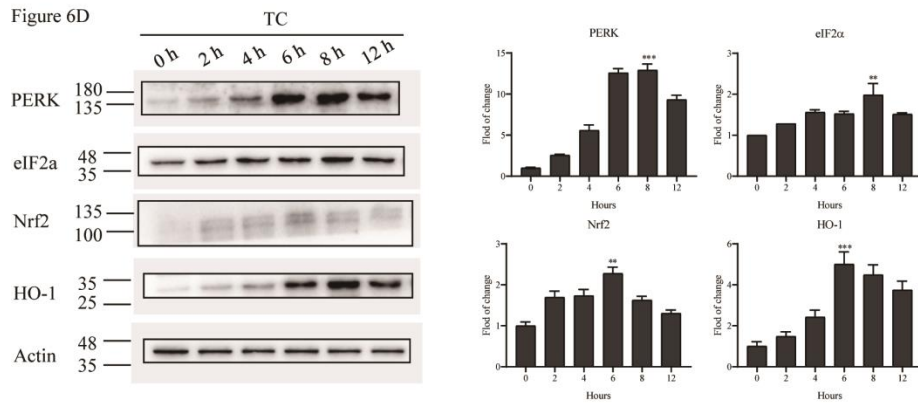

Figure 6F

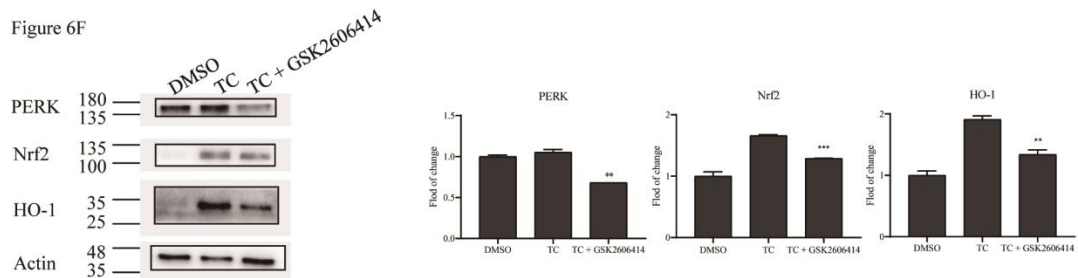

Figure 7G

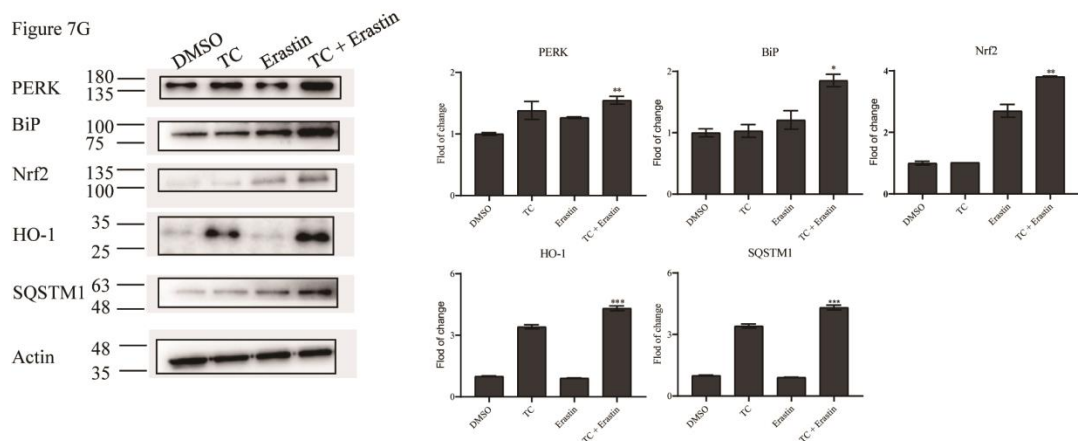

Supplement: ijbsv17p2703s1.pdf [file ijbsv17p2703s1.pdf]
